# Supplementary material
Source: Springer Nature journal article supplement (https://www.springermedizin.de/resource/supplementary/13075_2008_2546_MOESM2_ESM.pdf/9692336)

Additional data file 2

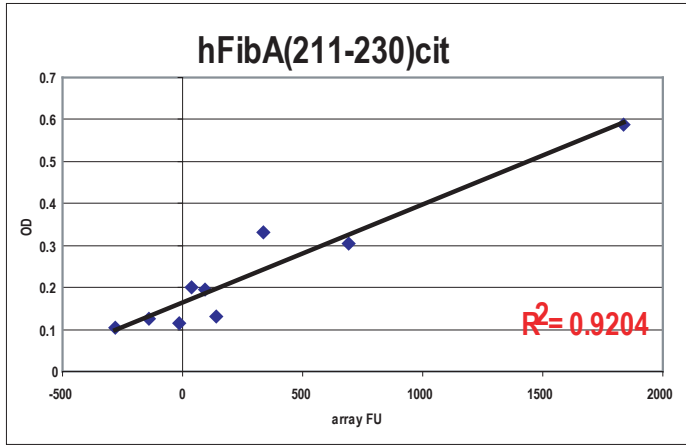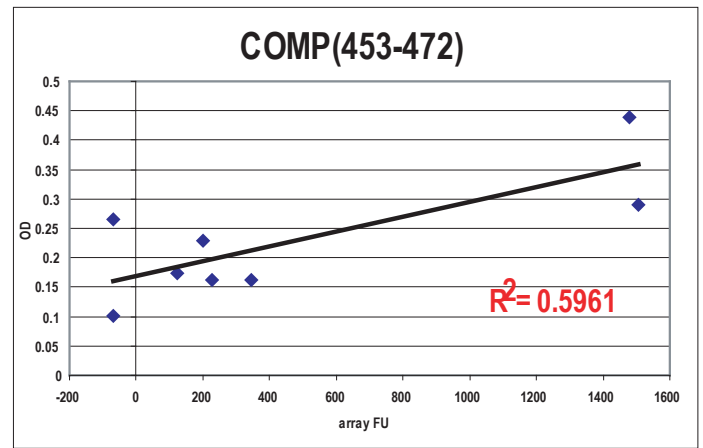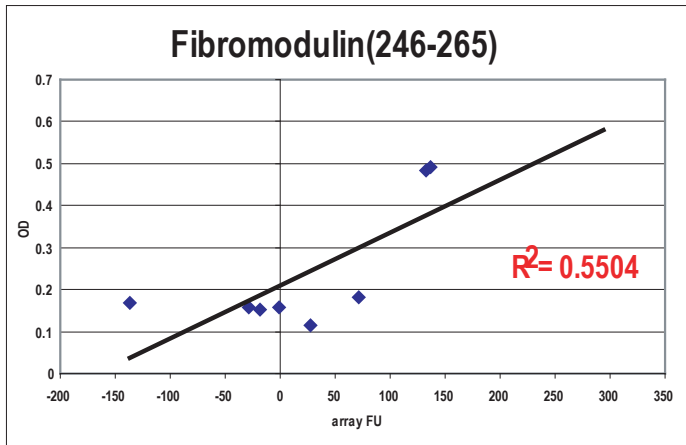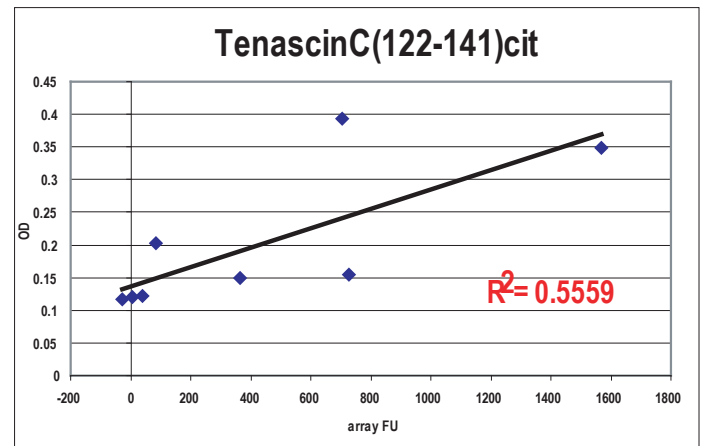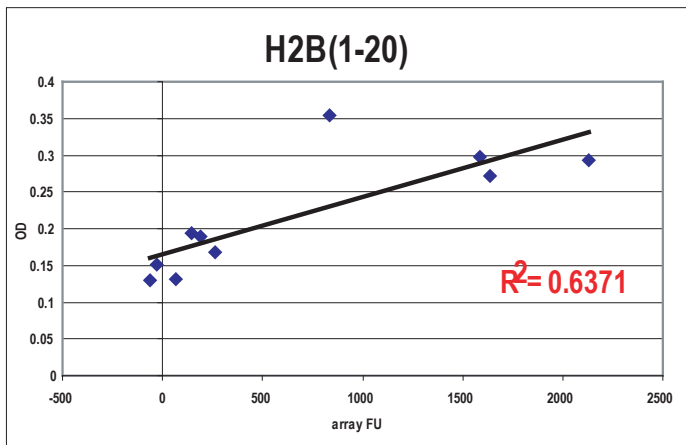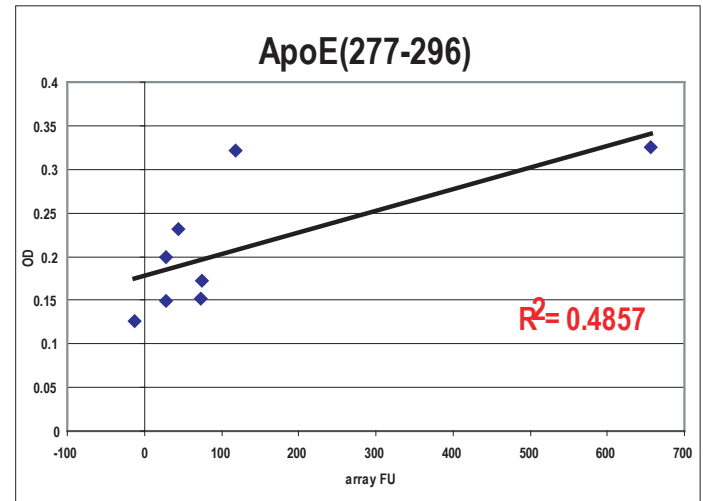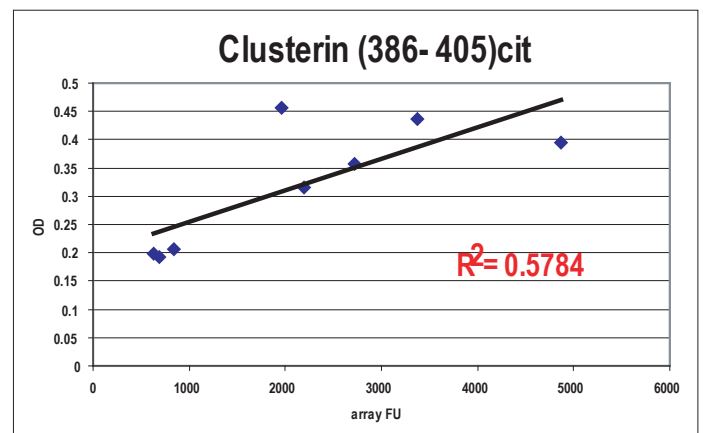

Supplement: MOESM2 [file 9692336]
